# Supplementary material
Source: ML conference proceedings conference paper supplement (https://proceedings.mlr.press/v119/jones20a.html)
Supplement: Supplementary file [file jones20a-supp.pdf]

## Appendix for Fair $k$ -Centers via Maximum Matching

Anonymous Authors<sup>1</sup>

### 1. Additional experiments

In this section, we provide further experiments on real and stimulated dataset. The experimental setup is the same as the other experiments, we adjust the constraint for required number of centers for each group. For stimulated data, we require one group to have one group to have disproportionately more than the reset. We set one groups to have the number of center to be 8 and set the rest to be 1. For real dataset, we set the number of center to be the same for each group. A-Gender and A-Race have 100 and 50 required centers for each group respectively. S-Sex, S-School, and S-Adress have 50 required centers for each group. Finally, each group in W-location has 20 required centers.

Table 4. Mean and standard deviation of objective value on stimulated data

| Algorithm    | 50 Groups          | 100 Groups         | 200 Groups         | 400 Groups         |
|--------------|--------------------|--------------------|--------------------|--------------------|
| Alg 2-Seq    | 6.4 (0.34)         | <b>6.17 (0.31)</b> | <b>6.35 (0.46)</b> | 6.41 (0.35)        |
| Alg 2-Heu B  | <b>6.36 (0.32)</b> | 6.22 (0.38)        | 6.36 (0.47)        | <b>6.31 (0.37)</b> |
| Kleindessner | 6.61 (0.55)        | 6.66 (0.76)        | 7.09 (0.65)        | 7.19 (0.48)        |
| Heuristic A  | 18.63 (2.18)       | 17.08 (1.34)       | 16.2 (1.52)        | 14.08 (1.41)       |
| Heuristic B  | 6.72 (0.28)        | 7.36 (1.15)        | 7.79 (0.68)        | 7.82 (0.65)        |
| Heuristic C  | 6.47 (0.4)         | 6.66 (0.45)        | 7.12 (0.52)        | 7.39 (0.55)        |

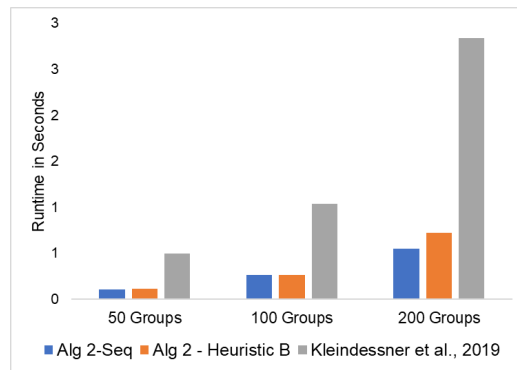

Figure 4. Mean runtime in seconds on stimulated data

Table 5. Mean and standard deviation of objective value on real data

| Algorithms   | A-Gender           | A-Race              | S-Sex              | S-School        | S-Address          | W-location          |
|--------------|--------------------|---------------------|--------------------|-----------------|--------------------|---------------------|
| Alg 2-Seq    | <b>0.27 (0.01)</b> | 0.36 (0.024)        | <b>0.98 (0.01)</b> | <b>1 (0.02)</b> | 1.03 (0.02)        | 0.17 (0.01)         |
| Alg 2-Heu B  | <b>0.27 (0.01)</b> | 0.34 (0.03)         | <b>0.98 (0.01)</b> | <b>1 (0.02)</b> | 1.03 (0.02)        | 0.17 (0.01)         |
| Kleindessner | 0.31 (0.02)        | 0.3 (0.02)          | 1 (0.04)           | 1.04 (0.05)     | 1.06 (0.05)        | <b>0.15 (0.01)</b>  |
| Heuristic A  | 0.3 (0.01)         | 0.38 (0.02)         | 1.04 (0.01)        | 1.04 (0.01)     | 1.06 (0.02)        | 0.21 (0.03)         |
| Heuristic B  | 0.28 (0.005)       | 0.37 (0.02)         | <b>0.98 (0.01)</b> | <b>1 (0.02)</b> | 1.04 (0.02)        | 0.19 (0.01)         |
| Heuristic C  | 0.28 (0.005)       | <b>0.26 (0.002)</b> | 1.03 (0.01)        | 1.04 (0.01)     | <b>0.99 (0.01)</b> | <b>0.15 (0.004)</b> |

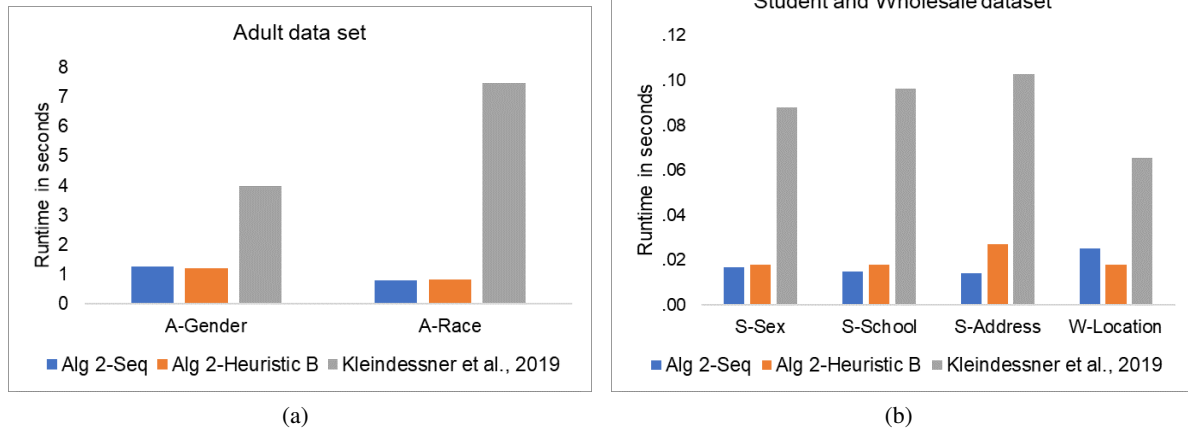

Figure 5. Mean runtime in seconds on real data

## 2. Full algorithm

Algorithm 4 gives the detailed algorithm for algorithm 2 in the paper. The algorithm starts by running the Gonzalez’s algorithm to compute  $k$  centers sequentially. The algorithm proceeds by running binary search to find the largest integer  $h$  such that the first  $h$  items in the sequence returned by Gonzalez’s algorithm satisfy the fair shift constraint. Then, another binary search procedure is to find the smallest radius that allow a fair shift. The centers  $C$  corresponding to this radius guarantees the 3-approximation according to Lemma 5.3. Finally, the algorithm arbitrarily adds any additional centers to  $C$  for the fairness constraint.

---

110 **Algorithm 4** 3-approximation algorithm for  $k$ -centers with fairness

---

111 **Input:** a set of points  $S = \{s_1, \dots, s_n\}$  each with a demographic group value  $f_i \in [m]$ , a distance metric  $d$ , the values  $k_f$   
 112 where  $\sum_f k_f = k$ , and a metric  $d$

113 **Output:** A set  $C$  such that  $C \subseteq S$  and  $|\{s_i | s_i \in C \wedge f_i = f\}| = k_f$  for all demographic group values  $f$

114

115 1 Run Algorithm 1 with the set of points  $S$ , the number of centers  $k$ , the metric  $d$ , and set  $(a_i)_{i=1}^k$  to be the returned centers as  
 116 a sequence. Record the values  $d_i$ .

117 2  $h_{l_0} \leftarrow 0, h_{h_i} \leftarrow k$

118 3  $G_0 \leftarrow \{V = \{s, t\} \sqcup \{v_f \mid \text{each dem. group value } f\}, E = \{(v_f, t), \text{ capacity} = k_f, r_e = 0 \mid \text{each dem. group value } f\}\}$

119 4  $G' \leftarrow G_0$

120 5 **while**  $h_{l_0} \neq h_{h_i}$  **do**

121 6      $G \leftarrow G', \ell \leftarrow \lceil (h_{l_0} + h_{h_i})/2 \rceil$

122 7     **for**  $j \leftarrow h_{l_0} + 1$  **to**  $\ell$  **do**

123 8          $G \leftarrow \{V(G) \sqcup \{v_j\}, E(G) \sqcup \{(s, v_j), \text{ capacity} = 1, r_e = 0\}\}$

124 9         Calculate the closest point to  $a_j$  for each demographic group  $f$  by a single sweep of  $S$

125 10         **for each group**  $f$  with  $d(a_j, S_f) \leq d_\ell/2$  **do**

126 11              $G \leftarrow \{V(G), E(G) \sqcup \{(v_j, v_f), \text{ capacity} = 1, r_{(v_j, v_f)} = d(a_j, S_f)\}\}$

127 12         **end**

128 13     **end**

129 14 Obtain flow  $F$  by running Dinic's algorithm on  $G$  from  $s$  to  $t$

130 15 **if**  $|F| = \ell$  **then**

131 16      $G' \leftarrow G, h_{l_0} \leftarrow \ell$

132 17 **end**

133 18 **else**

134 19      $h_{h_i} \leftarrow \ell - 1$

135 20 **end**

136 21 **end**

137 22  $G' \leftarrow \{V = V(G_0) \sqcup \{v_j \mid j = 1 \text{ to } h_{l_0}\}, E(G) \sqcup \{(s, v_j), \text{ capacity} = 1, r_e = 0 \mid j = 1 \text{ to } h_{l_0}\}\}$

138 23  $R \leftarrow \emptyset$

139 24 **for**  $j = 1$  **to**  $h$  **do**

140 25     Calculate the distance (denoted  $r_{(v_j, v_f)}$ ) of the closest point (denoted by  $p_{j,f}$ ) to  $a_j$  for each demographic group  $f$  by a  
 141 single sweep on  $S$

142 26     **for each group**  $f$  with  $r_{(v_j, v_f)} \leq d_{h_{l_0}}/2$  **do**

143 27          $R \leftarrow R \sqcup \{(r_{(v_j, v_f)}, p_{j,f})\}$

144 28     **end**

145 29 **end**

146 30  $F' \leftarrow \emptyset$

147 31 **while**  $|\{r \mid (r, p) \in R\}| > 1$  **do**

148 32      $G \leftarrow G', (r', p') \leftarrow \text{median } r_{(v, f)} \text{ in } R$

149 33     **for**  $(r_{(v_j, v_f)}, p_{j,f}) \in R \mid r_{(v_j, v_f)} \leq r'$  **do**

150 34          $G \leftarrow \{V(G), E(G) \sqcup \{(v_j, v_f), \text{ capacity} = 1, r_e = r_{(v_j, v_f)}, \text{ label} = p_{j,f}\}\}$

151 35     **end**

152 36 Obtain flow  $F$  by running Dinic's algorithm on  $G$  from  $s$  to  $t$

153 37 **if**  $|F| = h$  **then**

154 38      $F' \leftarrow F, R \leftarrow R \setminus \{(r, p) \in R \mid r \geq r'\}$

155 39 **end**

156 40 **else**

157 41      $G' \leftarrow G, R \leftarrow R \setminus \{(r, p) \in R \mid r \leq r'\}$

158 42 **end**

159 43 **end**

160 44 Obtain  $C$  from the labels of edges used in the flow  $F'$

161 45 Arbitrarily add centers to  $C$  to satisfy the fairness constraint to equality

162 46 **Return**  $C$

---

164
